# Supplementary material
Source: publisher site journal article supplement (https://www.dovepress.com/get_supplementary_file.php?f=448550.xlsx)
Supplement: Supplementary file 1 [file get_supplementary_file.php]

## Sheet: Supplementary Table 1
Supplementary Table 1 The pairs of the double-ended reads
SampleID	Input	Filtered	Denoised	Merged	Non#chimeric	Non#singleton
WT1	96289	88992	88478	88261	88065	88050
WT2	103095	95489	92963	86675	79814	79132
WT3	89938	83146	81680	78721	74865	74479
WT4	114067	104933	104397	103702	102510	102464
WT5	83571	76796	76404	76047	75857	75828
WT6	100376	92700	92114	91486	91216	91181
WT7	105894	98137	96880	93836	89212	88965
WT8	91072	83611	83308	82951	82122	82094
IMQ1	79200	72082	71642	71264	71048	71029
IMQ2	91429	83765	83397	82864	81719	81660
IMQ3	85549	78361	78079	77883	77785	77769
IMQ4	89986	81441	81107	80295	79973	79954
IMQ5	108952	98519	98133	97548	97503	97496
IMQ6	66583	61004	60604	60346	60217	60201
IMQ7	91893	84087	83740	83373	83257	83241
IMQ8	97815	89180	88896	88595	87695	87676
TP5_1	133729	124171	123827	123165	109351	109326
TP5_2	135443	126505	126094	125743	115290	115268
TP5_3	141668	132533	132228	131965	125804	125789
TP5_4	134891	125448	125161	124916	120801	120788
TP5_5	133690	120442	120169	119964	114673	114657
TP5_6	143271	133983	133772	133535	126633	126618
TP5_7	145180	136190	135947	135692	133862	133852
TP5_8	145757	133682	133062	132547	119148	119119

## Sheet: Supplementary Table 2
Supplementary Table 2 COG analysis
Level1	Level2	Abundance
Biosynthesis	Amine and Polyamine Biosynthesis	735.95
Biosynthesis	Amino Acid Biosynthesis	35004.1
Biosynthesis	Aminoacyl-tRNA Charging	1027.83
Biosynthesis	Aromatic Compound Biosynthesis	2501.25
Biosynthesis	Carbohydrate Biosynthesis	9501.25
Biosynthesis	Cell Structure Biosynthesis	8803.21
Biosynthesis	Cofactor, Prosthetic Group, Electron Carrier, and Vitamin Biosynthesis	35341.4
Biosynthesis	Fatty Acid and Lipid Biosynthesis	18572.8
Biosynthesis	Metabolic Regulator Biosynthesis	201.26
Biosynthesis	Nucleoside and Nucleotide Biosynthesis	32890.1
Biosynthesis	Other Biosynthesis	410.07
Biosynthesis	Secondary Metabolite Biosynthesis	5826.75
Degradation/Utilization/Assimilation	Alcohol Degradation	127.32
Degradation/Utilization/Assimilation	Aldehyde Degradation	10.55
Degradation/Utilization/Assimilation	Amine and Polyamine Degradation	3433.79
Degradation/Utilization/Assimilation	Amino Acid Degradation	2591.09
Degradation/Utilization/Assimilation	Aromatic Compound Degradation	2236.51
Degradation/Utilization/Assimilation	C1 Compound Utilization and Assimilation	4880.25
Degradation/Utilization/Assimilation	Carbohydrate Degradation	4984.85
Degradation/Utilization/Assimilation	Carboxylate Degradation	4986.62
Degradation/Utilization/Assimilation	Chlorinated Compound Degradation	6.53
Degradation/Utilization/Assimilation	Cofactor, Prosthetic Group, Electron Carrier Degradation	0.47
Degradation/Utilization/Assimilation	Degradation/Utilization/Assimilation - Other	195.41
Degradation/Utilization/Assimilation	Fatty Acid and Lipid Degradation	1447.37
Degradation/Utilization/Assimilation	Inorganic Nutrient Metabolism	4383.93
Degradation/Utilization/Assimilation	Nucleoside and Nucleotide Degradation	6381.58
Degradation/Utilization/Assimilation	Polymeric Compound Degradation	1052
Degradation/Utilization/Assimilation	Secondary Metabolite Degradation	5334.97
Detoxification	Antibiotic Resistance	712.69
Detoxification	methanol oxidation to carbon dioxide	71.94
Generation of Precursor Metabolite and Energy	1,5-anhydrofructose degradation	5.34
Generation of Precursor Metabolite and Energy	Electron Transfer	2934.87
Generation of Precursor Metabolite and Energy	Entner-Duodoroff Pathways	28.6
Generation of Precursor Metabolite and Energy	ethylmalonyl-CoA pathway	107.72
Generation of Precursor Metabolite and Energy	Fermentation	9680.91
Generation of Precursor Metabolite and Energy	formaldehyde oxidation I	711.34
Generation of Precursor Metabolite and Energy	Glycolysis	3997.68
Generation of Precursor Metabolite and Energy	glyoxylate cycle	553.74
Generation of Precursor Metabolite and Energy	isopropanol biosynthesis	54.53
Generation of Precursor Metabolite and Energy	methyl ketone biosynthesis	97.08
Generation of Precursor Metabolite and Energy	methylaspartate cycle	45.76
Generation of Precursor Metabolite and Energy	Pentose Phosphate Pathways	2380.48
Generation of Precursor Metabolite and Energy	Photosynthesis	1579.32
Generation of Precursor Metabolite and Energy	Respiration	2965.22
Generation of Precursor Metabolite and Energy	superpathway of glycolysis and Entner-Doudoroff	848.37
Generation of Precursor Metabolite and Energy	superpathway of glycolysis, pyruvate dehydrogenase, TCA, and glyoxylate bypass	870.75
Generation of Precursor Metabolite and Energy	TCA cycle	8371.31
Glycan Pathways	Glycan Biosynthesis	481.62
Glycan Pathways	Glycan Degradation	550.46
Macromolecule Modification	Nucleic Acid Processing	1390.26
Metabolic Clusters	L-glutamate and L-glutamine biosynthesis	356.67
Metabolic Clusters	O-antigen building blocks biosynthesis (E. coli)	805.94
Metabolic Clusters	phospholipases	1.77
Metabolic Clusters	pyrimidine deoxyribonucleotide phosphorylation	1162.38
Metabolic Clusters	pyrimidine deoxyribonucleotides biosynthesis from CTP	1.09
Metabolic Clusters	pyrimidine deoxyribonucleotides de novo biosynthesis I	922.51
Metabolic Clusters	pyrimidine deoxyribonucleotides de novo biosynthesis III	481.98
Metabolic Clusters	pyrimidine deoxyribonucleotides de novo biosynthesis IV	0.76
Metabolic Clusters	superpathway of L-aspartate and L-asparagine biosynthesis	202.16
Metabolic Clusters	tRNA charging	1027.83

## Sheet: Supplementary Table 3
Supplementary Table 3 KEGG metabolic pathway
pathway	description	logFC	SE	Pvalues	adjPvalues
P261-PWY	coenzyme M biosynthesis I	6.886	0.6315	0	0
PWY-5392	reductive TCA cycle II	6.515	0.6013	0	0
PWY-6641	superpathway of sulfolactate degradation	6.447	0.626	0	0
PWY-7332	superpathway of UDP-N-acetylglucosamine-derived O-antigen building blocks biosynthesis	5.89	0.5786	0	0
PWY-7255	ergothioneine biosynthesis I (bacteria)	5.554	0.9676	9.437e-09	2.298e-07
PWY-5941	glycogen degradation II (eukaryotic)	5.545	0.6983	1.998e-15	9.193e-14
PWY-7090	UDP-2,3-diacetamido-2,3-dideoxy-&alpha;-D-mannuronate biosynthesis	5.157	0.4765	0	0
PWY490-3	nitrate reduction VI (assimilatory)	5.009	1.105	5.776e-06	0.000104
PWY-5741	ethylmalonyl-CoA pathway	5.004	1.076	3.302e-06	6.214e-05
PWY-1541	superpathway of taurine degradation	4.989	0.8566	5.756e-09	1.589e-07
PWY-6404	superpathway of mycolyl-arabinogalactan-peptidoglycan complex biosynthesis	4.961	1.307	0.0001467	0.001898
PWY-7371	1,4-dihydroxy-6-naphthoate biosynthesis II	4.794	0.7943	1.589e-09	5.481e-08
ENTBACSYN-PWY	enterobactin biosynthesis	4.757	0.8029	3.133e-09	9.264e-08
PWY-7374	1,4-dihydroxy-6-naphthoate biosynthesis I	4.755	0.8211	6.988e-09	1.808e-07
VALDEG-PWY	L-valine degradation I	4.742	1.014	2.921e-06	5.759e-05
PWY-5419	catechol degradation to 2-oxopent-4-enoate II	4.733	1.181	6.123e-05	0.001014
P163-PWY	L-lysine fermentation to acetate and butanoate	4.72	0.7631	6.188e-10	2.329e-08
PWY-6948	sitosterol degradation to androstenedione	4.658	1.529	0.002316	0.01572
PWY-6210	2-aminophenol degradation	4.657	1.25	0.0001951	0.002218
PWY-5656	mannosylglycerate biosynthesis I	4.645	1.248	0.0001982	0.002218
PWY-7007	methyl ketone biosynthesis	4.55	1.208	0.0001656	0.002078
PWY-6263	superpathway of menaquinol-8 biosynthesis II	4.523	0.7525	1.848e-09	5.884e-08
PWY-5654	2-amino-3-carboxymuconate semialdehyde degradation to 2-oxopentenoate	4.504	1.127	6.421e-05	0.001022
PWY-6174	mevalonate pathway II (archaea)	4.457	0.8724	3.237e-07	7.053e-06
GLUCARDEG-PWY	D-glucarate degradation I	4.446	1.191	0.0001885	0.002218
PWY-1622	formaldehyde assimilation I (serine pathway)	4.416	1.131	9.454e-05	0.001398
PWY-6505	L-tryptophan degradation XII (Geobacillus)	4.399	1.201	0.0002484	0.002571
GALACTARDEG-PWY	D-galactarate degradation I	4.347	1.182	0.0002356	0.002501
GLUCARGALACTSUPER-PWY	superpathway of D-glucarate and D-galactarate degradation	4.347	1.182	0.0002356	0.002501
PWY-5420	catechol degradation II (meta-cleavage pathway)	4.272	1.108	0.0001151	0.001643
PWY-5647	2-nitrobenzoate degradation I	4.247	1.114	0.0001377	0.001838
PWY1G-0	mycothiol biosynthesis	4.147	1.136	0.0002627	0.002653
PWY-5655	L-tryptophan degradation IX	4.118	1.096	0.0001713	0.002086
PWY-7391	isoprene biosynthesis II (engineered)	4.102	0.8398	1.039e-06	2.15e-05
PWY-3661	glycine betaine degradation I	4.042	1.314	0.002104	0.01502
PWY-6383	mono-trans, poly-cis decaprenyl phosphate biosynthesis	4.007	1.202	0.0008567	0.00727
PWY-6749	CMP-legionaminate biosynthesis I	3.993	1.416	0.004811	0.02805
PWY-1422	vitamin E biosynthesis (tocopherols)	3.981	1.439	0.005656	0.0321
PWY-6397	mycolyl-arabinogalactan-peptidoglycan complex biosynthesis	3.92	1.369	0.004196	0.02537
PWY-6478	GDP-D-glycero-&alpha;-D-manno-heptose biosynthesis	3.723	1.71	0.02945	0.1334
PWY-7616	methanol oxidation to carbon dioxide	3.715	1.314	0.004688	0.02773
PWY-1882	superpathway of C1 compounds oxidation to CO2	3.707	0.9398	7.991e-05	0.001225
PWY-5430	meta cleavage pathway of aromatic compounds	3.657	1.12	0.001095	0.008886
PWY-5651	L-tryptophan degradation to 2-amino-3-carboxymuconate semialdehyde	3.618	1.163	0.001872	0.01409
PWY-6944	androstenedione degradation	3.606	1.033	0.0004784	0.004501
PWY-181	photorespiration	3.597	0.9389	0.0001279	0.001765
NADSYN-PWY	NAD biosynthesis II (from tryptophan)	3.584	1.149	0.001814	0.01391
ALL-CHORISMATE-PWY	superpathway of chorismate metabolism	3.568	0.9879	0.0003039	0.002995
PWY-2221	Entner-Doudoroff pathway III (semi-phosphorylative)	3.557	0.4085	0	0
DENITRIFICATION-PWY	nitrate reduction I (denitrification)	3.487	1.034	0.0007423	0.006681
RHAMCAT-PWY	L-rhamnose degradation I	3.464	1.192	0.00365	0.02289
PWY-7013	L-1,2-propanediol degradation	3.406	1.433	0.01745	0.08705
P621-PWY	nylon-6 oligomer degradation	3.389	0.5378	2.95e-10	1.221e-08
PWY-5676	acetyl-CoA fermentation to butanoate II	3.297	1.152	0.004222	0.02537
HCAMHPDEG-PWY	3-phenylpropanoate and 3-(3-hydroxyphenyl)propanoate degradation to 2-oxopent-4-enoate	3.288	2.043	0.1074	0.3529
PWY-6690	cinnamate and 3-hydroxycinnamate degradation to 2-oxopent-4-enoate	3.288	2.043	0.1074	0.3529
PWY0-1277	3-phenylpropanoate and 3-(3-hydroxyphenyl)propanoate degradation	3.279	1.725	0.0573	0.2118
PWY-7315	dTDP-N-acetylthomosamine biosynthesis	3.217	1.381	0.01987	0.09742
PWY-5860	superpathway of demethylmenaquinol-6 biosynthesis I	3.194	1.504	0.0337	0.1417
PWY-5862	superpathway of demethylmenaquinol-9 biosynthesis	3.194	1.504	0.0337	0.1417
PWY-6957	mandelate degradation to acetyl-CoA	3.157	0.1634	0	0
PWY-5845	superpathway of menaquinol-9 biosynthesis	3.127	1.48	0.03456	0.1417
PWY-5850	superpathway of menaquinol-6 biosynthesis I	3.127	1.48	0.03456	0.1417
PWY-5896	superpathway of menaquinol-10 biosynthesis	3.127	1.48	0.03456	0.1417
FUCCAT-PWY	fucose degradation	3.111	0.8883	0.0004619	0.004447
PWY-5198	factor 420 biosynthesis	3.108	1.423	0.02896	0.1332
CHLOROPHYLL-SYN	chlorophyllide a biosynthesis I (aerobic, light-dependent)	3.052	1.037	0.003259	0.02076
CODH-PWY	reductive acetyl coenzyme A pathway	3.019	0.9896	0.00228	0.01572
PWY-6728	methylaspartate cycle	2.993	1.389	0.03114	0.1371
PWY-1501	mandelate degradation I	2.984	0.2751	0	0
PWY-5415	catechol degradation I (meta-cleavage pathway)	2.972	1.345	0.0271	0.1275
P241-PWY	coenzyme B biosynthesis	2.879	0.9324	0.002014	0.01489
PWY-6876	isopropanol biosynthesis	2.83	1.933	0.1431	0.4101
P124-PWY	Bifidobacterium shunt	2.83	1.181	0.0166	0.08383
PWY-5529	superpathway of bacteriochlorophyll a biosynthesis	2.792	1.113	0.01211	0.06347
PWY-5183	superpathway of aerobic toluene degradation	2.778	1.05	0.008178	0.04455
P281-PWY	3-phenylpropanoate degradation	2.718	1.83	0.1375	0.4101
PWY-6071	superpathway of phenylethylamine degradation	2.678	1.396	0.05507	0.2055
PWY-7527	L-methionine salvage cycle III	2.676	0.869	0.002078	0.01502
PWY-4361	S-methyl-5-thio-&alpha;-D-ribose 1-phosphate degradation	2.673	0.8763	0.002289	0.01572
PWY-6992	1,5-anhydrofructose degradation	2.663	0.9013	0.003137	0.02061
PWY-5178	toluene degradation IV (aerobic) (via catechol)	2.627	1.039	0.0115	0.06104
CRNFORCAT-PWY	creatinine degradation I	2.599	1.289	0.04385	0.1729
PWY-3801	sucrose degradation II (sucrose synthase)	2.558	0.8104	0.001597	0.01248
P122-PWY	heterolactic fermentation	2.494	1.149	0.03003	0.1337
GALLATE-DEGRADATION-I-PWY	gallate degradation II	2.48	1.49	0.09595	0.3246
METHYLGALLATE-DEGRADATION-PWY	methylgallate degradation	2.473	1.488	0.09645	0.3246
PWY-5531	chlorophyllide a biosynthesis II (anaerobic)	2.472	1.943	0.2033	0.4951
PWY-7159	chlorophyllide a biosynthesis III (aerobic, light independent)	2.472	1.943	0.2033	0.4951
SUCSYN-PWY	sucrose biosynthesis I (from photosynthesis)	2.348	0.7127	0.0009846	0.008152
PWY-7377	cob(II)yrinate a,c-diamide biosynthesis I (early cobalt insertion)	2.345	1.322	0.07622	0.2723
PWY-6588	pyruvate fermentation to acetone	2.326	1.465	0.1123	0.3632
FUC-RHAMCAT-PWY	superpathway of fucose and rhamnose degradation	2.326	0.6941	0.0008066	0.007105
ECASYN-PWY	enterobacterial common antigen biosynthesis	2.269	0.7695	0.00319	0.02064
P184-PWY	protocatechuate degradation I (meta-cleavage pathway)	2.256	1.828	0.2172	0.5052
PWY-6562	norspermidine biosynthesis	2.241	1.322	0.09013	0.3124
PWY-5505	L-glutamate and L-glutamine biosynthesis	2.187	1.547	0.1573	0.4288
PWY-5677	succinate fermentation to butanoate	2.166	0.9531	0.02307	0.111
PWY-6339	syringate degradation	2.162	0.9292	0.02	0.09742
P164-PWY	purine nucleobases degradation I (anaerobic)	2.143	1.322	0.105	0.3505
PWY-7446	sulfoglycolysis	2.142	1.696	0.2066	0.4951
PWY-5104	L-isoleucine biosynthesis IV	2.128	1.109	0.05509	0.2055
PWY-7003	glycerol degradation to butanol	2.12	0.7774	0.006397	0.03579
PWY-6338	superpathway of vanillin and vanillate degradation	2.097	1.911	0.2725	0.5798
PWY-7097	vanillin and vanillate degradation I	2.097	1.911	0.2725	0.5798
PWY-7098	vanillin and vanillate degradation II	2.094	1.898	0.27	0.5798
PWY-7323	superpathway of GDP-mannose-derived O-antigen building blocks biosynthesis	2.067	1.288	0.1085	0.3538
PWY0-1479	tRNA processing	2.024	1.509	0.18	0.4717
P108-PWY	pyruvate fermentation to propanoate I	2.023	0.9418	0.03171	0.1382
COLANSYN-PWY	colanic acid building blocks biosynthesis	1.976	0.8744	0.02383	0.1134
POLYAMSYN-PWY	superpathway of polyamine biosynthesis I	1.845	1.25	0.1399	0.4101
PWY-6906	chitin derivatives degradation	1.828	0.5485	0.0008605	0.00727
PWY-6731	starch degradation III	1.798	0.4347	3.536e-05	0.00061
POLYAMINSYN3-PWY	superpathway of polyamine biosynthesis II	1.783	1.204	0.1387	0.4101
PWY-7347	sucrose biosynthesis III	1.699	0.535	0.001499	0.01193
ARG+POLYAMINE-SYN	superpathway of arginine and polyamine biosynthesis	1.696	1.209	0.1606	0.4317
PWY-5088	L-glutamate degradation VIII (to propanoate)	1.593	1.238	0.1982	0.4951
PWY-5180	toluene degradation I (aerobic) (via o-cresol)	1.587	1.445	0.2719	0.5798
PWY-5182	toluene degradation II (aerobic) (via 4-methylcatechol)	1.587	1.445	0.2719	0.5798
NAD-BIOSYNTHESIS-II	NAD salvage pathway II	1.541	1.695	0.3635	0.5798
P23-PWY	reductive TCA cycle I	1.517	0.9735	0.1191	0.3823
GOLPDLCAT-PWY	superpathway of glycerol degradation to 1,3-propanediol	1.508	1.397	0.2805	0.5798
GALACT-GLUCUROCAT-PWY	superpathway of hexuronide and hexuronate degradation	1.489	1.354	0.2714	0.5798
PWY-7295	L-arabinose degradation IV	1.478	1.942	0.4467	0.589
PWY-6507	4-deoxy-L-threo-hex-4-enopyranuronate degradation	1.466	1.752	0.4026	0.5798
PWY0-1533	methylphosphonate degradation I	1.398	1.213	0.2494	0.5561
THISYN-PWY	superpathway of thiamin diphosphate biosynthesis I	1.331	0.9085	0.143	0.4101
LIPASYN-PWY	phospholipases	1.289	0.3797	0.0006855	0.006306
PWY-6892	thiazole biosynthesis I (E. coli)	1.274	1.293	0.3246	0.5798
GALLATE-DEGRADATION-II-PWY	gallate degradation I	1.251	2.183	0.5664	0.6877
PWY-7024	superpathway of the 3-hydroxypropanoate cycle	1.245	1.165	0.2852	0.5798
PWY-6470	peptidoglycan biosynthesis V (&beta;-lactam resistance)	1.227	1.329	0.3559	0.5798
PWY-5744	glyoxylate assimilation	1.17	1.203	0.3308	0.5798
PWY-3941	&beta;-alanine biosynthesis II	1.135	0.4395	0.009808	0.05273
PWY-7328	superpathway of UDP-glucose-derived O-antigen building blocks biosynthesis	1.129	0.7987	0.1574	0.4288
METH-ACETATE-PWY	methanogenesis from acetate	1.105	1.329	0.4059	0.5798
P161-PWY	acetylene degradation	1.095	1.112	0.3247	0.5798
METHGLYUT-PWY	superpathway of methylglyoxal degradation	1.086	1.352	0.4215	0.5835
PWY-5181	toluene degradation III (aerobic) (via p-cresol)	1.075	1.048	0.3051	0.5798
CENTFERM-PWY	pyruvate fermentation to butanoate	1.036	1.066	0.331	0.5798
GALACTUROCAT-PWY	D-galacturonate degradation I	1.03	1.389	0.4583	0.6004
PWY-5507	adenosylcobalamin biosynthesis I (early cobalt insertion)	1.016	1.622	0.531	0.6582
PWY-7431	aromatic biogenic amine degradation (bacteria)	0.9861	1.006	0.3272	0.5798
PWY-6590	superpathway of Clostridium acetobutylicum acidogenic fermentation	0.9818	1.036	0.3431	0.5798
PWY-6107	chlorosalicylate degradation	0.9739	0.4721	0.03911	0.1557
PWY-7084	nitrifier denitrification	0.8291	0.2898	0.004228	0.02537
PWY-1361	benzoyl-CoA degradation I (aerobic)	0.8216	0.9057	0.3644	0.5798
PWY0-781	aspartate superpathway	0.8172	0.6899	0.2362	0.5405
PWY-6182	superpathway of salicylate degradation	0.7877	1.089	0.4697	0.6114
PWY-5971	palmitate biosynthesis II (bacteria and plants)	0.7576	0.5332	0.1554	0.4288
PWY-6185	4-methylcatechol degradation (ortho cleavage)	0.7388	1.092	0.4987	0.6296
GLYCOGENSYNTH-PWY	glycogen biosynthesis I (from ADP-D-Glucose)	0.6523	0.5057	0.1971	0.4951
KDO-NAGLIPASYN-PWY	superpathway of (Kdo)2-lipid A biosynthesis	0.6429	1.553	0.679	0.7841
PWY-7210	pyrimidine deoxyribonucleotides biosynthesis from CTP	0.634	0.359	0.07734	0.2737
ORNDEG-PWY	superpathway of ornithine degradation	0.6283	1.077	0.5597	0.6835
PWY-7046	4-coumarate degradation (anaerobic)	0.579	0.2662	0.02963	0.1334
DTDPRHAMSYN-PWY	dTDP-L-rhamnose biosynthesis I	0.5546	0.5934	0.35	0.5798
P381-PWY	adenosylcobalamin biosynthesis II (late cobalt incorporation)	0.5481	1.718	0.7497	0.8366
P341-PWY	glycolysis V (Pyrococcus)	0.5447	0.3073	0.0763	0.2723
PWY-7198	pyrimidine deoxyribonucleotides de novo biosynthesis IV	0.5342	0.3178	0.09278	0.3174
PWY0-1241	ADP-L-glycero-&beta;-D-manno-heptose biosynthesis	0.5224	0.8806	0.553	0.6794
PWY-5347	superpathway of L-methionine biosynthesis (transsulfuration)	0.5086	0.7155	0.4772	0.6193
PWY-7398	coumarins biosynthesis (engineered)	0.4292	0.4109	0.2962	0.5798
PWY-6629	superpathway of L-tryptophan biosynthesis	0.4125	0.2121	0.05177	0.1984
GLYCOCAT-PWY	glycogen degradation I (bacterial)	0.3956	0.5871	0.5004	0.6296
PWY-6467	Kdo transfer to lipid IVA III (Chlamydia)	0.3935	0.6949	0.5712	0.6895
P4-PWY	superpathway of L-lysine, L-threonine and L-methionine biosynthesis I	0.3773	0.5506	0.4932	0.6296
OANTIGEN-PWY	O-antigen building blocks biosynthesis (E. coli)	0.3497	0.5007	0.4849	0.6259
P441-PWY	superpathway of N-acetylneuraminate degradation	0.327	0.9494	0.7306	0.8219
PWY-7385	1,3-propanediol biosynthesis (engineered)	0.3224	0.3393	0.342	0.5798
NAGLIPASYN-PWY	lipid IVA biosynthesis	0.2858	0.6688	0.6692	0.7782
PWY-6486	D-galacturonate degradation II	0.2768	0.2838	0.3293	0.5798
ARGDEG-PWY	superpathway of L-arginine, putrescine, and 4-aminobutanoate degradation	0.2766	1.229	0.822	0.905
ORNARGDEG-PWY	superpathway of L-arginine and L-ornithine degradation	0.2766	1.229	0.822	0.905
PWY-6919	neopentalenoketolactone and pentalenate biosynthesis	0.2751	0.1935	0.155	0.4288
PWY-5499	vitamin B6 degradation	0.2323	0.2169	0.2843	0.5798
PYRIDNUCSAL-PWY	NAD salvage pathway I	0.2321	0.5626	0.6799	0.7841
PWY-5757	fosfomycin biosynthesis	0.2294	0.2713	0.3978	0.5798
PROTOCATECHUATE-ORTHO-CLEAVAGE-PWY	protocatechuate degradation II (ortho-cleavage pathway)	0.1933	0.7924	0.8073	0.8936
PWY-6565	superpathway of polyamine biosynthesis III	0.1926	0.2077	0.3538	0.5798
AEROBACTINSYN-PWY	aerobactin biosynthesis	0.1674	0.1734	0.3343	0.5798
PWY-5659	GDP-mannose biosynthesis	0.1599	0.4996	0.7489	0.8366
PWY-5913	TCA cycle VI (obligate autotrophs)	0.1507	0.5706	0.7916	0.8786
PWY-1269	CMP-3-deoxy-D-manno-octulosonate biosynthesis I	0.1441	0.7683	0.8512	0.9225
PWY-6713	L-rhamnose degradation II	0.1181	0.07599	0.1202	0.3829
PWY0-321	phenylacetate degradation I (aerobic)	0.1062	1.293	0.9345	0.972
CENTBENZCOA-PWY	benzoyl-CoA degradation II (anaerobic)	0.1021	0.05164	0.04799	0.1857
PENTOSE-P-PWY	pentose phosphate pathway	0.09938	0.5455	0.8554	0.9226
LPSSYN-PWY	superpathway of lipopolysaccharide biosynthesis	0.08348	0.04932	0.09055	0.3124
PWY-6915	pentalenolactone biosynthesis	0.05224	0.06314	0.4081	0.5798
PWYG-321	mycolate biosynthesis	0.04009	0.6147	0.948	0.9787
HOMOSER-METSYN-PWY	L-methionine biosynthesis I	0.0397	0.4114	0.9231	0.9629
COBALSYN-PWY	adenosylcobalamin salvage from cobinamide I	0.03939	0.6847	0.9541	0.9802
PWY-5743	3-hydroxypropanoate cycle	0.03454	1.435	0.9808	0.9948
PWY-5989	stearate biosynthesis II (bacteria and plants)	0.02277	0.6216	0.9708	0.9916
ASPASN-PWY	superpathway of L-aspartate and L-asparagine biosynthesis	0.005788	0.7713	0.994	0.9964
PWY-6956	naphthalene degradation to acetyl-CoA	0.005601	0.01536	0.7153	0.8113
GLYCOLYSIS-E-D	superpathway of glycolysis and Entner-Doudoroff	0.003824	0.4744	0.9936	0.9964
PWY-5427	naphthalene degradation (aerobic)	0.002839	0.01395	0.8387	0.9137
PWY-6282	palmitoleate biosynthesis I (from (5Z)-dodec-5-enoate)	-0.0007779	0.6203	0.999	0.999
FASYN-INITIAL-PWY	superpathway of fatty acid biosynthesis initiation (E. coli)	-0.006811	0.6395	0.9915	0.9964
PWY-4722	creatinine degradation II	-0.006815	0.01458	0.6401	0.755
PWY-7094	fatty acid salvage	-0.006877	0.4655	0.9882	0.9964
PWY-5532	adenosine nucleotides degradation IV	-0.01138	0.02161	0.5984	0.7139
PWY-5823	superpathway of CDP-glucose-derived O-antigen building blocks biosynthesis	-0.01282	0.01716	0.4548	0.5978
PWY0-862	(5Z)-dodec-5-enoate biosynthesis	-0.01331	0.6159	0.9828	0.9948
PWY-7664	oleate biosynthesis IV (anaerobic)	-0.019	0.6025	0.9748	0.9916
PWY-6581	spirilloxanthin and 2,2'-diketo-spirilloxanthin biosynthesis	-0.02054	0.02175	0.345	0.5798
PWY-7373	superpathway of demethylmenaquinol-6 biosynthesis II	-0.02973	0.02817	0.2913	0.5798
UBISYN-PWY	superpathway of ubiquinol-8 biosynthesis (prokaryotic)	-0.03242	0.6133	0.9578	0.9816
THREOCAT-PWY	superpathway of L-threonine metabolism	-0.0377	1.093	0.9725	0.9916
PWY-6608	guanosine nucleotides degradation III	-0.0391	0.4932	0.9368	0.972
LEU-DEG2-PWY	L-leucine degradation I	-0.05312	0.7059	0.94	0.9729
GLYOXYLATE-BYPASS	glyoxylate cycle	-0.05991	0.5934	0.9196	0.9629
MET-SAM-PWY	superpathway of S-adenosyl-L-methionine biosynthesis	-0.06358	0.4004	0.8738	0.9256
PWY-6353	purine nucleotides degradation II (aerobic)	-0.07529	0.3803	0.8431	0.9161
PWY-5154	L-arginine biosynthesis III (via N-acetyl-L-citrulline)	-0.07599	0.5269	0.8853	0.9303
PWY-5695	urate biosynthesis/inosine 5'-phosphate degradation	-0.08225	0.4821	0.8645	0.9256
GLYCOL-GLYOXDEG-PWY	superpathway of glycol metabolism and degradation	-0.08669	1.473	0.9531	0.9802
PWY-5097	L-lysine biosynthesis VI	-0.09098	0.4204	0.8287	0.906
PWY-5855	ubiquinol-7 biosynthesis (prokaryotic)	-0.09417	0.6053	0.8764	0.9256
PWY-5856	ubiquinol-9 biosynthesis (prokaryotic)	-0.09417	0.6053	0.8764	0.9256
PWY-5857	ubiquinol-10 biosynthesis (prokaryotic)	-0.09417	0.6053	0.8764	0.9256
PWY-6708	ubiquinol-8 biosynthesis (prokaryotic)	-0.09417	0.6053	0.8764	0.9256
PYRIDNUCSYN-PWY	NAD biosynthesis I (from aspartate)	-0.09622	0.6102	0.8747	0.9256
NONMEVIPP-PWY	methylerythritol phosphate pathway I	-0.1024	0.5721	0.858	0.9226
PWY-7560	methylerythritol phosphate pathway II	-0.1024	0.5721	0.858	0.9226
PWY-5121	superpathway of geranylgeranyl diphosphate biosynthesis II (via MEP)	-0.1176	0.5459	0.8294	0.906
PWY-7456	mannan degradation	-0.1359	1.414	0.9234	0.9629
PWY-6737	starch degradation V	-0.1443	0.6608	0.8271	0.906
PWY0-1415	superpathway of heme biosynthesis from uroporphyrinogen-III	-0.1566	0.4097	0.7023	0.8032
DAPLYSINESYN-PWY	L-lysine biosynthesis I	-0.1617	0.4284	0.7058	0.805
PWY-7211	superpathway of pyrimidine deoxyribonucleotides de novo biosynthesis	-0.1626	0.4445	0.7145	0.8113
1CMET2-PWY	N10-formyl-tetrahydrofolate biosynthesis	-0.1753	0.4548	0.6999	0.8027
PWY-5920	superpathway of heme biosynthesis from glycine	-0.1756	0.4064	0.6657	0.7763
PWY-6572	chondroitin sulfate degradation I (bacterial)	-0.1756	0.1208	0.146	0.4101
PWY-6519	8-amino-7-oxononanoate biosynthesis I	-0.193	0.5436	0.7225	0.8151
PWY-3781	aerobic respiration I (cytochrome c)	-0.1953	0.6365	0.7589	0.8446
GLYCOLYSIS-TCA-GLYOX-BYPASS	superpathway of glycolysis, pyruvate dehydrogenase, TCA, and glyoxylate bypass	-0.2007	0.4178	0.6309	0.7463
PWY-7184	pyrimidine deoxyribonucleotides de novo biosynthesis I	-0.2053	0.4659	0.6594	0.7712
BIOTIN-BIOSYNTHESIS-PWY	biotin biosynthesis I	-0.2069	0.4981	0.6778	0.7841
PWY-5918	superpathay of heme biosynthesis from glutamate	-0.2164	0.4446	0.6263	0.743
PWY-6471	peptidoglycan biosynthesis IV (Enterococcus faecium)	-0.2196	0.6102	0.719	0.8133
SALVADEHYPOX-PWY	adenosine nucleotides degradation II	-0.2219	0.5677	0.6959	0.8003
PWY-6545	pyrimidine deoxyribonucleotides de novo biosynthesis III	-0.242	0.721	0.7372	0.8271
GLUTORN-PWY	L-ornithine biosynthesis	-0.2421	0.488	0.6198	0.7373
PWY-7392	taxadiene biosynthesis (engineered)	-0.2423	0.53	0.6475	0.7594
PWY0-166	superpathway of pyrimidine deoxyribonucleotides de novo biosynthesis (E. coli)	-0.2533	0.4723	0.5917	0.7079
P101-PWY	ectoine biosynthesis	-0.2607	1.794	0.8844	0.9303
TCA-GLYOX-BYPASS	superpathway of glyoxylate bypass and TCA	-0.2981	0.506	0.5558	0.6807
PWY-6895	superpathway of thiamin diphosphate biosynthesis II	-0.3004	0.5406	0.5785	0.6962
TRNA-CHARGING-PWY	tRNA charging	-0.3496	0.4744	0.4612	0.6023
PWY0-1586	peptidoglycan maturation (meso-diaminopimelate containing)	-0.3538	0.6486	0.5854	0.7024
FERMENTATION-PWY	mixed acid fermentation	-0.3724	0.4742	0.4323	0.5878
PWY-6901	superpathway of glucose and xylose degradation	-0.3849	0.503	0.4442	0.5888
PWY-5509	adenosylcobalamin biosynthesis from cobyrinate a,c-diamide I	-0.4067	0.6766	0.5478	0.675
FAO-PWY	fatty acid &beta;-oxidation I	-0.4116	0.6068	0.4976	0.6296
PWY-6269	adenosylcobalamin salvage from cobinamide II	-0.4124	0.677	0.5425	0.6704
PWY-5345	superpathway of L-methionine biosynthesis (by sulfhydrylation)	-0.4194	0.488	0.3902	0.5798
PWY-5265	peptidoglycan biosynthesis II (staphylococci)	-0.4263	0.6237	0.4943	0.6296
P105-PWY	TCA cycle IV (2-oxoglutarate decarboxylase)	-0.4275	0.5002	0.3928	0.5798
PWY0-1261	anhydromuropeptides recycling	-0.4306	0.3984	0.2798	0.5798
PWY-5838	superpathway of menaquinol-8 biosynthesis I	-0.4541	0.5465	0.406	0.5798
PWY-5861	superpathway of demethylmenaquinol-8 biosynthesis	-0.4576	0.5533	0.4082	0.5798
P562-PWY	myo-inositol degradation I	-0.4736	0.7315	0.5173	0.6471
PWY-6396	superpathway of 2,3-butanediol biosynthesis	-0.477	1.027	0.6424	0.7556
FASYN-ELONG-PWY	fatty acid elongation -- saturated	-0.4935	0.8501	0.5616	0.6838
ILEUSYN-PWY	L-isoleucine biosynthesis I (from threonine)	-0.5208	0.8247	0.5277	0.656
VALSYN-PWY	L-valine biosynthesis	-0.5208	0.8247	0.5277	0.656
ARGSYN-PWY	L-arginine biosynthesis I (via L-ornithine)	-0.5331	0.4665	0.2532	0.5605
PWY-7400	L-arginine biosynthesis IV (archaebacteria)	-0.5358	0.4656	0.2498	0.5561
PWY-5101	L-isoleucine biosynthesis II	-0.5635	0.8286	0.4965	0.6296
TYRFUMCAT-PWY	L-tyrosine degradation I	-0.5672	0.743	0.4452	0.5888
PWY-7376	cob(II)yrinate a,c-diamide biosynthesis II (late cobalt incorporation)	-0.5726	0.7395	0.4388	0.5878
BRANCHED-CHAIN-AA-SYN-PWY	superpathway of branched amino acid biosynthesis	-0.5751	0.827	0.4868	0.6259
PRPP-PWY	superpathway of histidine, purine, and pyrimidine biosynthesis	-0.6023	0.5194	0.2462	0.554
PWY-6609	adenine and adenosine salvage III	-0.6073	0.9083	0.5037	0.6319
NONOXIPENT-PWY	pentose phosphate pathway (non-oxidative branch)	-0.619	0.8043	0.4416	0.5878
PWY-6317	galactose degradation I (Leloir pathway)	-0.6277	0.9286	0.4991	0.6296
PWY-7221	guanosine ribonucleotides de novo biosynthesis	-0.6314	0.8194	0.441	0.5878
PWY-5973	cis-vaccenate biosynthesis	-0.6328	0.7942	0.4256	0.5853
PWY-7111	pyruvate fermentation to isobutanol (engineered)	-0.6357	0.8162	0.4361	0.5878
PWY-5103	L-isoleucine biosynthesis III	-0.6385	0.8285	0.4409	0.5878
PWY-6969	TCA cycle V (2-oxoglutarate:ferredoxin oxidoreductase)	-0.6452	0.8346	0.4394	0.5878
PWY-6122	5-aminoimidazole ribonucleotide biosynthesis II	-0.6512	0.8269	0.431	0.5878
PWY-6277	superpathway of 5-aminoimidazole ribonucleotide biosynthesis	-0.6512	0.8269	0.431	0.5878
PWY-7228	superpathway of guanosine nucleotides de novo biosynthesis I	-0.658	0.8221	0.4235	0.5844
PWY-6125	superpathway of guanosine nucleotides de novo biosynthesis II	-0.6635	0.8231	0.4202	0.5835
PWY-3001	superpathway of L-isoleucine biosynthesis I	-0.667	0.8238	0.4181	0.5833
PWY-7663	gondoate biosynthesis (anaerobic)	-0.6684	0.7994	0.4031	0.5798
PWY-6121	5-aminoimidazole ribonucleotide biosynthesis I	-0.6718	0.8185	0.4118	0.5798
PWY-7219	adenosine ribonucleotides de novo biosynthesis	-0.6723	0.8178	0.411	0.5798
PWY-2942	L-lysine biosynthesis III	-0.6751	0.8128	0.4062	0.5798
UDPNAGSYN-PWY	UDP-N-acetyl-D-glucosamine biosynthesis I	-0.6753	0.8225	0.4116	0.5798
COA-PWY	coenzyme A biosynthesis I	-0.6754	0.8223	0.4115	0.5798
PWY-5188	tetrapyrrole biosynthesis I (from glutamate)	-0.6764	0.8344	0.4176	0.5833
PWY-841	superpathway of purine nucleotides de novo biosynthesis I	-0.678	0.8202	0.4085	0.5798
CALVIN-PWY	Calvin-Benson-Bassham cycle	-0.6802	0.8192	0.4064	0.5798
PWY-5686	UMP biosynthesis	-0.6814	0.8133	0.4021	0.5798
PWY0-162	superpathway of pyrimidine ribonucleotides de novo biosynthesis	-0.6859	0.8177	0.4015	0.5798
PWY-7229	superpathway of adenosine nucleotides de novo biosynthesis I	-0.6888	0.8203	0.4011	0.5798
PWY-6126	superpathway of adenosine nucleotides de novo biosynthesis II	-0.6895	0.8218	0.4015	0.5798
PWY-5189	tetrapyrrole biosynthesis II (from glycine)	-0.6907	0.8244	0.4021	0.5798
PWY4FS-7	phosphatidylglycerol biosynthesis I (plastidic)	-0.6923	0.8078	0.3914	0.5798
PWY4FS-8	phosphatidylglycerol biosynthesis II (non-plastidic)	-0.6923	0.8078	0.3914	0.5798
GLYCOLYSIS	glycolysis I (from glucose 6-phosphate)	-0.6932	0.8415	0.4101	0.5798
PHOSLIPSYN-PWY	superpathway of phospholipid biosynthesis I (bacteria)	-0.6936	0.8025	0.3874	0.5798
POLYISOPRENSYN-PWY	polyisoprenoid biosynthesis (E. coli)	-0.6951	0.8426	0.4094	0.5798
PWY-7197	pyrimidine deoxyribonucleotide phosphorylation	-0.6965	0.826	0.3991	0.5798
PWY-6123	inosine-5'-phosphate biosynthesis I	-0.698	0.82	0.3946	0.5798
THRESYN-PWY	superpathway of L-threonine biosynthesis	-0.6984	0.8224	0.3958	0.5798
TRPSYN-PWY	L-tryptophan biosynthesis	-0.7033	0.825	0.3939	0.5798
PWY-6897	thiamin salvage II	-0.7056	0.8408	0.4013	0.5798
PWY-7187	pyrimidine deoxyribonucleotides de novo biosynthesis II	-0.7076	0.565	0.2104	0.4952
PWY-7220	adenosine deoxyribonucleotides de novo biosynthesis II	-0.708	0.8272	0.3921	0.5798
PWY-7222	guanosine deoxyribonucleotides de novo biosynthesis II	-0.708	0.8272	0.3921	0.5798
RIBOSYN2-PWY	flavin biosynthesis I (bacteria and plants)	-0.7157	0.8185	0.3819	0.5798
PWY-4984	urea cycle	-0.7163	0.9213	0.4369	0.5878
PEPTIDOGLYCANSYN-PWY	peptidoglycan biosynthesis I (meso-diaminopimelate containing)	-0.7217	0.8199	0.3787	0.5798
PWY-6387	UDP-N-acetylmuramoyl-pentapeptide biosynthesis I (meso-diaminopimelate containing)	-0.7282	0.8188	0.3738	0.5798
PWY-6385	peptidoglycan biosynthesis III (mycobacteria)	-0.7415	0.8228	0.3675	0.5798
PWY-7208	superpathway of pyrimidine nucleobases salvage	-0.7439	0.827	0.3684	0.5798
ANAGLYCOLYSIS-PWY	glycolysis III (from glucose)	-0.7496	0.8384	0.3713	0.5798
COMPLETE-ARO-PWY	superpathway of aromatic amino acid biosynthesis	-0.7503	0.8021	0.3496	0.5798
ARO-PWY	chorismate biosynthesis I	-0.7531	0.8005	0.3468	0.5798
PWY-5667	CDP-diacylglycerol biosynthesis I	-0.7546	0.7912	0.3402	0.5798
PWY0-1319	CDP-diacylglycerol biosynthesis II	-0.7546	0.7912	0.3402	0.5798
REDCITCYC	TCA cycle VIII (helicobacter)	-0.7579	0.8398	0.3668	0.5798
PWY0-1296	purine ribonucleosides degradation	-0.7585	0.9375	0.4184	0.5833
PWY-5484	glycolysis II (from fructose 6-phosphate)	-0.7591	0.8426	0.3676	0.5798
PWY-6163	chorismate biosynthesis from 3-dehydroquinate	-0.7652	0.8033	0.3408	0.5798
HISTSYN-PWY	L-histidine biosynthesis	-0.7653	0.8219	0.3518	0.5798
PWY-7234	inosine-5'-phosphate biosynthesis III	-0.7679	0.8318	0.3559	0.5798
TCA	TCA cycle I (prokaryotic)	-0.7701	0.8265	0.3515	0.5798
SER-GLYSYN-PWY	superpathway of L-serine and glycine biosynthesis I	-0.7751	0.8	0.3327	0.5798
PWY-6386	UDP-N-acetylmuramoyl-pentapeptide biosynthesis II (lysine-containing)	-0.7764	0.8229	0.3454	0.5798
PANTOSYN-PWY	pantothenate and coenzyme A biosynthesis I	-0.777	0.8231	0.3452	0.5798
PWY-7200	superpathway of pyrimidine deoxyribonucleoside salvage	-0.78	0.872	0.371	0.5798
HEMESYN2-PWY	heme biosynthesis II (anaerobic)	-0.7881	0.8326	0.3439	0.5798
PWY-7539	6-hydroxymethyl-dihydropterin diphosphate biosynthesis III (Chlamydia)	-0.7897	0.8154	0.3328	0.5798
ANAEROFRUCAT-PWY	homolactic fermentation	-0.7898	0.86	0.3584	0.5798
PWY0-1061	superpathway of L-alanine biosynthesis	-0.792	0.5636	0.16	0.4317
PWY-5747	2-methylcitrate cycle II	-0.7994	0.686	0.2439	0.5519
GLUCONEO-PWY	gluconeogenesis I	-0.8054	0.8429	0.3393	0.5798
SULFATE-CYS-PWY	superpathway of sulfate assimilation and cysteine biosynthesis	-0.8203	0.8199	0.317	0.5798
PWY-6147	6-hydroxymethyl-dihydropterin diphosphate biosynthesis I	-0.8275	0.8136	0.3091	0.5798
HSERMETANA-PWY	L-methionine biosynthesis III	-0.8296	0.856	0.3325	0.5798
PWY-6630	superpathway of L-tyrosine biosynthesis	-0.8336	0.4426	0.05963	0.2185
ARGSYNBSUB-PWY	L-arginine biosynthesis II (acetyl cycle)	-0.8385	0.8056	0.298	0.5798
SO4ASSIM-PWY	sulfate reduction I (assimilatory)	-0.8597	0.8432	0.3079	0.5798
PWY-6628	superpathway of L-phenylalanine biosynthesis	-0.8603	0.4434	0.05235	0.1989
PWY-7196	superpathway of pyrimidine ribonucleosides salvage	-0.8661	0.8707	0.3199	0.5798
PANTO-PWY	phosphopantothenate biosynthesis I	-0.8758	0.8205	0.2858	0.5798
PWY-7199	pyrimidine deoxyribonucleosides salvage	-0.8773	0.9068	0.3333	0.5798
FOLSYN-PWY	superpathway of tetrahydrofolate biosynthesis and salvage	-0.8831	0.8205	0.2818	0.5798
PWY0-1297	superpathway of purine deoxyribonucleosides degradation	-0.8868	0.9159	0.3329	0.5798
PWY-6700	queuosine biosynthesis	-0.8919	0.8378	0.2871	0.5798
PWY-5840	superpathway of menaquinol-7 biosynthesis	-0.91	0.976	0.3511	0.5798
PWY-5897	superpathway of menaquinol-11 biosynthesis	-0.9105	0.9778	0.3518	0.5798
PWY-5898	superpathway of menaquinol-12 biosynthesis	-0.9105	0.9778	0.3518	0.5798
PWY-5899	superpathway of menaquinol-13 biosynthesis	-0.9105	0.9778	0.3518	0.5798
PWY-5028	L-histidine degradation II	-0.9203	0.6583	0.1621	0.433
P42-PWY	incomplete reductive TCA cycle	-0.932	0.9049	0.303	0.5798
PWY-6612	superpathway of tetrahydrofolate biosynthesis	-0.9413	0.8267	0.2549	0.5612
PWY0-42	2-methylcitrate cycle I	-0.9495	0.7471	0.2038	0.4951
HEME-BIOSYNTHESIS-II	heme biosynthesis I (aerobic)	-0.9824	0.8972	0.2735	0.5798
HISDEG-PWY	L-histidine degradation I	-1.025	0.8658	0.2363	0.5405
P162-PWY	L-glutamate degradation V (via hydroxyglutarate)	-1.051	1.848	0.5695	0.6894
PWY-6703	preQ0 biosynthesis	-1.066	0.8243	0.196	0.4951
KETOGLUCONMET-PWY	ketogluconate metabolism	-1.072	0.8173	0.1899	0.4913
PWY-2941	L-lysine biosynthesis II	-1.074	0.7043	0.1271	0.3927
PWY-5863	superpathway of phylloquinol biosynthesis	-1.081	1.036	0.2968	0.5798
PWY-5837	1,4-dihydroxy-2-naphthoate biosynthesis I	-1.121	1.049	0.285	0.5798
PWY-7254	TCA cycle VII (acetate-producers)	-1.131	0.8744	0.1959	0.4951
HEXITOLDEGSUPER-PWY	superpathway of hexitol degradation (bacteria)	-1.136	0.7752	0.1429	0.4101
PPGPPMET-PWY	ppGpp biosynthesis	-1.166	1.177	0.3221	0.5798
PWY0-1298	superpathway of pyrimidine deoxyribonucleosides degradation	-1.166	0.9124	0.2011	0.4951
ARGORNPROST-PWY	arginine, ornithine and proline interconversion	-1.172	0.6897	0.08934	0.3124
DENOVOPURINE2-PWY	superpathway of purine nucleotides de novo biosynthesis II	-1.174	0.9315	0.2076	0.4951
PWY-5384	sucrose degradation IV (sucrose phosphorylase)	-1.193	0.9528	0.2105	0.4952
PWY-5705	allantoin degradation to glyoxylate III	-1.197	1.101	0.2771	0.5798
GLUCOSE1PMETAB-PWY	glucose and glucose-1-phosphate degradation	-1.2	0.9627	0.2124	0.4969
P125-PWY	superpathway of (R,R)-butanediol biosynthesis	-1.206	0.9546	0.2064	0.4951
PWY-5100	pyruvate fermentation to acetate and lactate II	-1.246	1.045	0.2332	0.5393
P461-PWY	hexitol fermentation to lactate, formate, ethanol and acetate	-1.249	0.8541	0.1438	0.4101
3-HYDROXYPHENYLACETATE-DEGRADATION-PWY	4-hydroxyphenylacetate degradation	-1.253	0.9955	0.2081	0.4951
PWY-5022	4-aminobutanoate degradation V	-1.274	0.9931	0.1997	0.4951
PWY-5304	superpathway of sulfur oxidation (Acidianus ambivalens)	-1.296	1.105	0.2409	0.5479
GLUCUROCAT-PWY	superpathway of &beta;-D-glucuronide and D-glucuronate degradation	-1.341	1.036	0.1957	0.4951
PWY0-845	superpathway of pyridoxal 5'-phosphate biosynthesis and salvage	-1.358	0.5607	0.01543	0.07886
PWY-7237	myo-, chiro- and scillo-inositol degradation	-1.359	0.9777	0.1645	0.4339
PWY-7242	D-fructuronate degradation	-1.363	0.939	0.1466	0.4101
PWY-6151	S-adenosyl-L-methionine cycle I	-1.382	0.9515	0.1463	0.4101
PWY-6891	thiazole biosynthesis II (Bacillus)	-1.452	0.9409	0.1228	0.3873
CATECHOL-ORTHO-CLEAVAGE-PWY	catechol degradation to &beta;-ketoadipate	-1.489	0.7993	0.06249	0.2269
PWY-1861	formaldehyde assimilation II (RuMP Cycle)	-1.527	1.096	0.1634	0.4336
PYRIDOXSYN-PWY	pyridoxal 5'-phosphate biosynthesis I	-1.583	0.6324	0.01232	0.06376
RUMP-PWY	formaldehyde oxidation I	-1.612	1.108	0.1458	0.4101
PWY0-41	allantoin degradation IV (anaerobic)	-1.614	1.224	0.1872	0.4874
PWY-5417	catechol degradation III (ortho-cleavage pathway)	-1.637	0.7778	0.03527	0.1418
PWY-5431	aromatic compounds degradation via &beta;-ketoadipate	-1.637	0.7778	0.03527	0.1418
PWY-621	sucrose degradation III (sucrose invertase)	-1.651	1.078	0.1257	0.3914
TEICHOICACID-PWY	teichoic acid (poly-glycerol) biosynthesis	-1.707	1.152	0.1383	0.4101
PWY-5910	superpathway of geranylgeranyldiphosphate biosynthesis I (via mevalonate)	-1.708	1.171	0.1446	0.4101
P221-PWY	octane oxidation	-1.739	0.8707	0.04582	0.1789
PWY-5177	glutaryl-CoA degradation	-1.782	2.556	0.4856	0.6259
GLCMANNANAUT-PWY	superpathway of N-acetylglucosamine, N-acetylmannosamine and N-acetylneuraminate degradation	-1.828	1.187	0.1235	0.3873
PWY-922	mevalonate pathway I	-1.877	1.236	0.1288	0.395
AST-PWY	L-arginine degradation II (AST pathway)	-2.299	0.7724	0.002914	0.01946
LACTOSECAT-PWY	lactose and galactose degradation I	-2.45	1.112	0.02761	0.1284
PWY-5005	biotin biosynthesis II	-3.352	1.583	0.03421	0.1417
PWY-722	nicotinate degradation I	-3.396	1.227	0.00566	0.0321
DHGLUCONATE-PYR-CAT-PWY	glucose degradation (oxidative)	-4.126	1.525	0.006838	0.03775
PWY0-1338	polymyxin resistance	-6.887	1.336	2.525e-07	5.807e-06
